# Supplementary material for: White Adipose Tissue Depots Respond to Chronic Beta-3 Adrenergic Receptor Activation in a Sexually Dimorphic and Depot Divergent Manner
Source: MDPI journal article supplement (doi:10.3390/cells10123453), 2021-12-08
Supplement: s1 [file s1]

**Table S1.** Western blot antibodies.

| <b>WESTERN BLOT ANTIBODIES</b>    |                           |                   |
|-----------------------------------|---------------------------|-------------------|
| <b>Antibody</b>                   | <b>Source</b>             | <b>Identifier</b> |
| Mouse Anti-Glut4                  | Cell Signaling Technology | #2213             |
| Mouse Anti-OXPHOS Cocktail        | Abcam                     | #110413           |
| Rabbit Anti-PGC1alpha             | Millipore Sigma           | #516557           |
| Rabbit Anti-UCP1                  | Millipore Sigma           | #U6382            |
| Rabbit Anti-GRP75                 | Cell Signaling Technology | #2816             |
| Rabbit Anti-Adiponectin           | Cell Signaling Technology | #2789             |
| Rabbit Anti-Leptin                | Abcam                     | ab117751          |
| Rabbit Anti-Beta3 AR              | Abcam                     | ab94506           |
| Rabbit Anti-ATGL                  | Cell Signaling Technology | #2138             |
| Rabbit Anti-HSL                   | Cell Signaling Technology | #4107             |
| Rabbit Anti-FAS                   | Cell Signaling Technology | #3189             |
| Rabbit Anti-Total AMPK            | Cell Signaling Technology | #2532             |
| Rabbit Anti-Phosphoserine AMPK    | Cell Signaling Technology | #4185             |
| Rabbit Anti-Phosphothreonine AMPK | Cell Signaling Technology | #2531             |
| Rabbit Anti-ERalpha               | Abcam                     | ab75635           |
| Rabbit Anti-ERbeta                | Abcam                     | ab3577            |
| Rabbit Anti-Beta Actin            | Abcam                     | ab8227            |
| Goat Anti-Rabbit IgG              | Cell Signaling Technology | #7074             |
| Horse Anti-Mouse IgG              | Cell Signaling Technology | #7076             |

**Table S2.** qRT-PCR primers.

| <b>qRT-PCR PRIMER SEQUENCES</b> |                                  |                                  |
|---------------------------------|----------------------------------|----------------------------------|
| <b>Gene</b>                     | <b>Forward Primer (5' to 3')</b> | <b>Reverse Primer (5' to 3')</b> |
| Ppargc1a                        | GTTGCCTGCATGAGTGTGTG             | TAGAGACGGCTCTTCTGCCT             |
| Ucp1                            | CGCAGGGAAAGAAACAGCAC             | GTTCCAGGATCCAAGTCGCA             |
| Hspa9                           | TGATTGGAATTCCTCCAGCC             | TGCACTGCCACGATTACTGT             |
| Cidea                           | TGACCCCCCTCATACATCCA             | GGCTACTTCGGTCATGGTTT             |
| Prdm16                          | CAGCACGGTGAAGCCATTC              | GCGTGCATCCGCTTGTG                |
| Adipoq                          | TTCCATACCAGAGGGGCTCA             | ACTCCGGTTTCACCGATGTC             |
| Lep                             | AACCCTGTGCGGATTCTTGT             | GGAGACTGACTGCGTGTGTG             |
| Lipe                            | CCGAGATGTCACAGTCAATGGA           | CAGGCCGCAGAAAAAAG                |
| Fasn                            | GATTCAGGGAGTGGCTATTG             | CATTCAGAATCGTGGCATAG             |
| Esr1                            | TGCGAGCACATTCCTTCCTT             | CTTCGTAGCATTTGCGGAGC             |
| Esr2                            | GCATTGCCTGAACAAAGCCA             | TTGGGACAGCACTCTTCGTC             |
| Actb                            | AGACCTGTACGCCAACACAG             | TTCTGCATCCTGTCGGCAAT             |

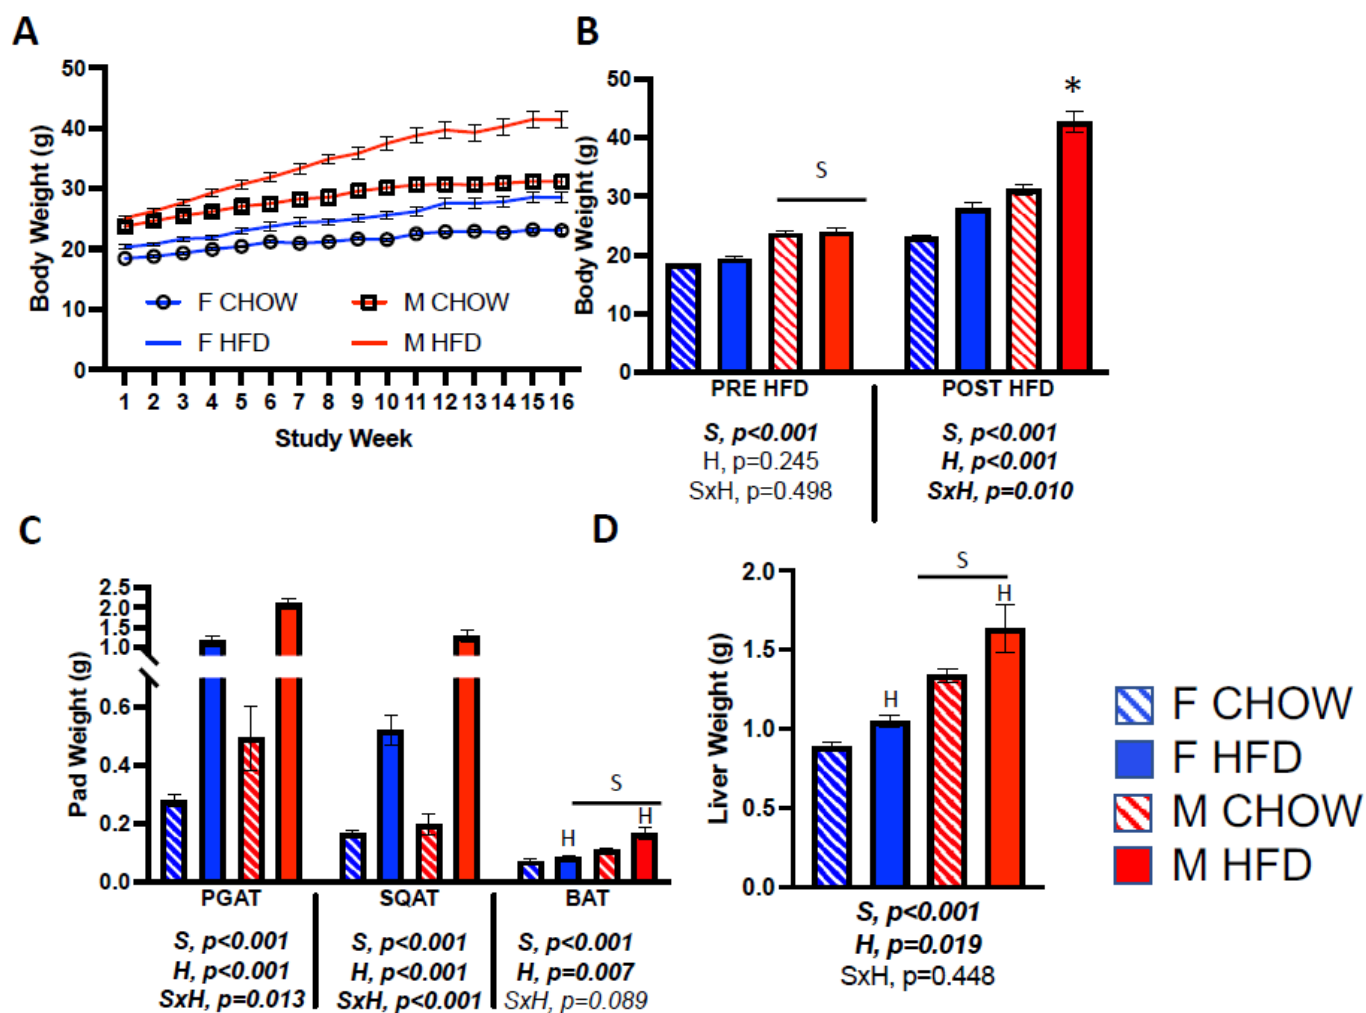

**Figure S1.** Sex differences in HFD-induced obesity. All mice are C57BL/6J, male (M) or female (F), fed standard chow (CHOW) or high fat diet (HFD). **(A)** Body weight throughout study; **(B)** Body weight pre- and post-HFD; **(C)** Pad weight for perigonadal (PGAT), subcutaneous (SQAT) and brown (BAT) adipose tissue depots; **(D)** liver weight. All data are presented as mean  $\pm$  SEM.  $N=7-15$ /group. Main effects of sex (S), high fat diet (H) and sex by diet interactions (S $\times$ H) were determined by 2 $\times$ 2 ANOVA and are presented below the respective figures.  $p$ -value  $< 0.05$  was accepted as significant. \* Significantly different from all other groups via post hoc Tukey's test.

| DEPOT       | PGAT   |    |      |    | SQAT   |    |      |    | BAT    |    |      |    |
|-------------|--------|----|------|----|--------|----|------|----|--------|----|------|----|
| SEX         | Female |    | Male |    | Female |    | Male |    | Female |    | Male |    |
| TREATMENT   | CTRL   | CL | CTRL | CL | CTRL   | CL | CTRL | CL | CTRL   | CL | CTRL | CL |
| UCP1        |        |    |      |    |        |    |      |    |        |    |      |    |
| PGC1a       |        |    |      |    |        |    |      |    |        |    |      |    |
| GRP75       |        |    |      |    |        |    |      |    |        |    |      |    |
| Adiponectin |        |    |      |    |        |    |      |    |        |    |      |    |
| Leptin      |        |    |      |    |        |    |      |    |        |    |      |    |
| B3AR        |        |    |      |    |        |    |      |    |        |    |      |    |
| ATGL        |        |    |      |    |        |    |      |    |        |    |      |    |
| HSL         |        |    |      |    |        |    |      |    |        |    |      |    |
| FAS         |        |    |      |    |        |    |      |    |        |    |      |    |
| tAMPK       |        |    |      |    |        |    |      |    |        |    |      |    |
| p(T)AMPK    |        |    |      |    |        |    |      |    |        |    |      |    |
| p(S)AMPK    |        |    |      |    |        |    |      |    |        |    |      |    |
| ER alpha    |        |    |      |    |        |    |      |    |        |    |      |    |
| ER beta     |        |    |      |    |        |    |      |    |        |    |      |    |
| Beta-Actin  |        |    |      |    |        |    |      |    |        |    |      |    |

| SEX        | Female |    |      |    | Male |    |      |    |
|------------|--------|----|------|----|------|----|------|----|
| DEPOT      | PGAT   |    | SQAT |    | PGAT |    | SQAT |    |
| TREATMENT  | CTRL   | CL | CTRL | CL | CTRL | CL | CTRL | CL |
| PGC1a      |        |    |      |    |      |    |      |    |
| UCP1       |        |    |      |    |      |    |      |    |
| GRP75      |        |    |      |    |      |    |      |    |
| ER beta    |        |    |      |    |      |    |      |    |
| ER alpha   |        |    |      |    |      |    |      |    |
| Beta-Actin |        |    |      |    |      |    |      |    |

Figure S2. Representative Western blot images.
